# Supplementary material for: An observation-constrained multi-physics WRF ensemble for simulating European mega heat waves
Source: Copernicus journal article supplement (doi:10.5194/gmd-8-2285-2015), 2015-07-29
Supplement: Supplementary file [file gmd-8-2285-2015-supplement.pdf]

Supplement of Geosci. Model Dev., 8, 2285–2298, 2015  
<http://www.geosci-model-dev.net/8/2285/2015/>  
doi:10.5194/gmd-8-2285-2015-supplement  
© Author(s) 2015. CC Attribution 3.0 License.

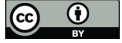

*Supplement of*

## **An observation-constrained multi-physics WRF ensemble for simulating European mega heat waves**

**A. I. Stegehuis et al.**

*Correspondence to:* A. I. Stegehuis ([annemiek.stegehuis@lsce.ipsl.fr](mailto:annemiek.stegehuis@lsce.ipsl.fr))

The copyright of individual parts of the supplement might differ from the CC-BY 3.0 licence.

## 1 Supplementary material

### 2 Table S1: Final ranks.

| Final rank | Physic combinations |     |    |    |    |    |
|------------|---------------------|-----|----|----|----|----|
|            | MP                  | PBL | SF | RA | CU | SU |
| 1          | 10                  | 1   | 1  | 4  | 6  | 2  |
| 2          | 6                   | 5   | 5  | 4  | 3  | 2  |
| 3          | 6                   | 7   | 1  | 5  | 6  | 2  |
| 4          | 8                   | 5   | 5  | 4  | 14 | 2  |
| 5          | 8                   | 7   | 1  | 4  | 6  | 2  |
| 6          | 8                   | 7   | 1  | 5  | 6  | 2  |
| 7          | 10                  | 5   | 2  | 4  | 6  | 2  |
| 8          | 6                   | 1   | 1  | 3  | 6  | 2  |
| 9          | 10                  | 2   | 2  | 4  | 6  | 2  |
| 10         | 10                  | 5   | 5  | 4  | 6  | 2  |
| 11         | 8                   | 4   | 4  | 4  | 6  | 2  |
| 12         | 8                   | 5   | 5  | 4  | 3  | 2  |
| 13         | 6                   | 7   | 1  | 4  | 6  | 2  |
| 14         | 8                   | 5   | 2  | 4  | 14 | 2  |
| 15         | 6                   | 7   | 1  | 3  | 6  | 2  |
| 16         | 6                   | 4   | 4  | 4  | 6  | 2  |
| 17         | 6                   | 7   | 1  | 4  | 3  | 2  |
| 18         | 6                   | 5   | 5  | 4  | 14 | 2  |
| 19         | 8                   | 5   | 5  | 5  | 6  | 2  |
| 20         | 8                   | 1   | 1  | 5  | 6  | 2  |
| 21         | 8                   | 2   | 2  | 4  | 14 | 2  |
| 22         | 6                   | 2   | 2  | 5  | 6  | 2  |
| 23         | 8                   | 5   | 2  | 5  | 6  | 2  |
| 24         | 6                   | 5   | 2  | 4  | 14 | 2  |
| 25         | 8                   | 2   | 2  | 5  | 6  | 2  |
| 26         | 8                   | 5   | 2  | 3  | 6  | 2  |
| 27         | 6                   | 5   | 5  | 5  | 6  | 2  |
| 28         | 8                   | 1   | 1  | 5  | 3  | 2  |
| 29         | 8                   | 5   | 5  | 3  | 6  | 2  |
| 30         | 6                   | 5   | 2  | 3  | 6  | 2  |
| 31         | 8                   | 7   | 1  | 4  | 14 | 2  |
| 32         | 8                   | 1   | 1  | 4  | 14 | 2  |
| 33         | 6                   | 2   | 2  | 3  | 6  | 2  |
| 34         | 6                   | 7   | 1  | 4  | 14 | 2  |
| 35         | 6                   | 5   | 5  | 3  | 6  | 2  |
| 36         | 6                   | 2   | 2  | 4  | 14 | 2  |
| 37         | 8                   | 2   | 2  | 3  | 6  | 2  |
| 38         | 10                  | 5   | 5  | 4  | 1  | 2  |
| 39         | 6                   | 1   | 1  | 5  | 14 | 2  |
| 40         | 10                  | 5   | 2  | 4  | 1  | 2  |
| 41         | 6                   | 1   | 1  | 4  | 14 | 2  |
| 42         | 10                  | 1   | 1  | 4  | 1  | 2  |
| 43         | 6                   | 7   | 1  | 4  | 1  | 2  |
| 44         | 6                   | 5   | 5  | 5  | 1  | 2  |
| 45         | 8                   | 7   | 1  | 4  | 1  | 2  |
| 46         | 8                   | 2   | 2  | 4  | 1  | 2  |
| 47         | 6                   | 5   | 5  | 4  | 1  | 2  |
| 48         | 8                   | 5   | 2  | 4  | 1  | 2  |
| 49         | 8                   | 5   | 5  | 4  | 1  | 2  |
| 50         | 8                   | 6   | 6  | 4  | 1  | 2  |
| 51         | 8                   | 5   | 2  | 4  | 1  | 2  |
| 52         | 6                   | 5   | 2  | 5  | 1  | 2  |
| 53         | 6                   | 1   | 1  | 4  | 1  | 2  |
| 54         | 8                   | 1   | 1  | 4  | 1  | 2  |
| 55         | 8                   | 2   | 2  | 5  | 1  | 2  |

3

4

5 **Figure S1a-d:** Timeseries over France 2003 (a,b) and 2007 (c,d) and Russia (e,f) with maximum (a,c,e)  
6 and minimum (b,d,f) daily temperatures. Every simulation is shown in gray and observations of E-OBS  
7 in black. The blue and red lines are the coldest and the warmest simulations over France during the  
8 heatwave. These lines have the same set of physics in all the figures.

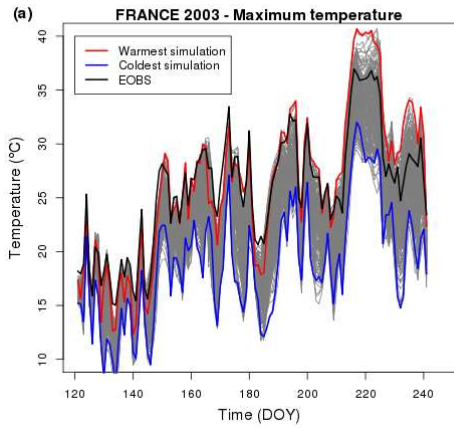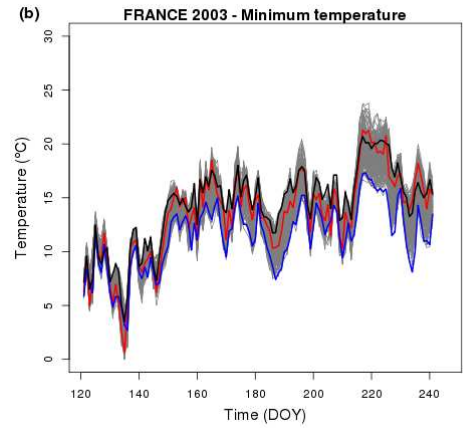

9

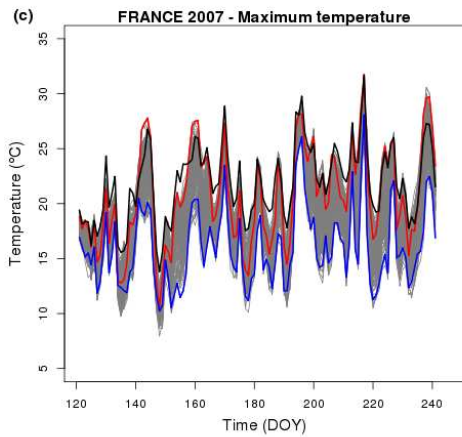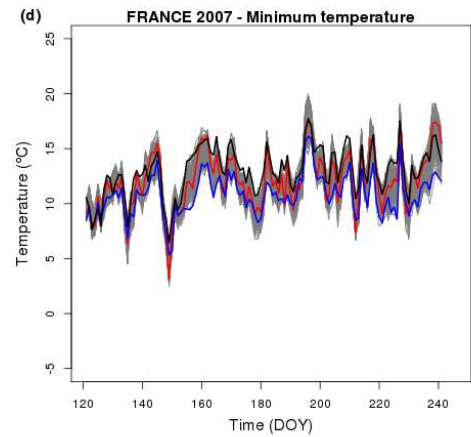

10

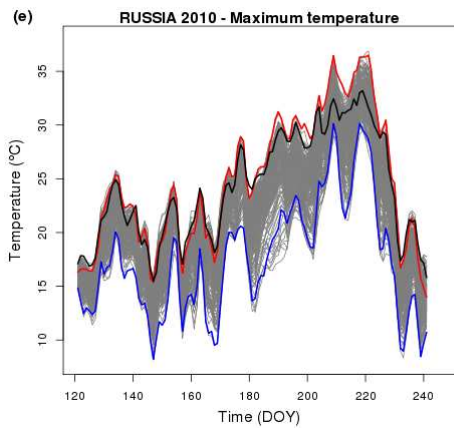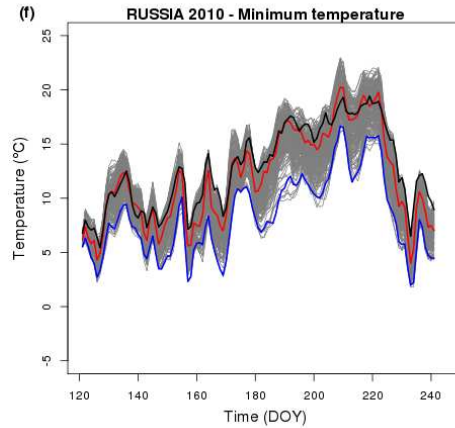

11

12 **Figure S2a-d:** Scatter plot with soil moisture content at July 31<sup>st</sup> and precipitation in the preceding  
13 months of June-July. Every point is one simulation. Different colors and symbols represent different  
14 physics for convection (CU) (a), microphysics (MP) (b), radiation (RA) (c) and planet boundary layer-  
15 surface (PBL-SF) (d).

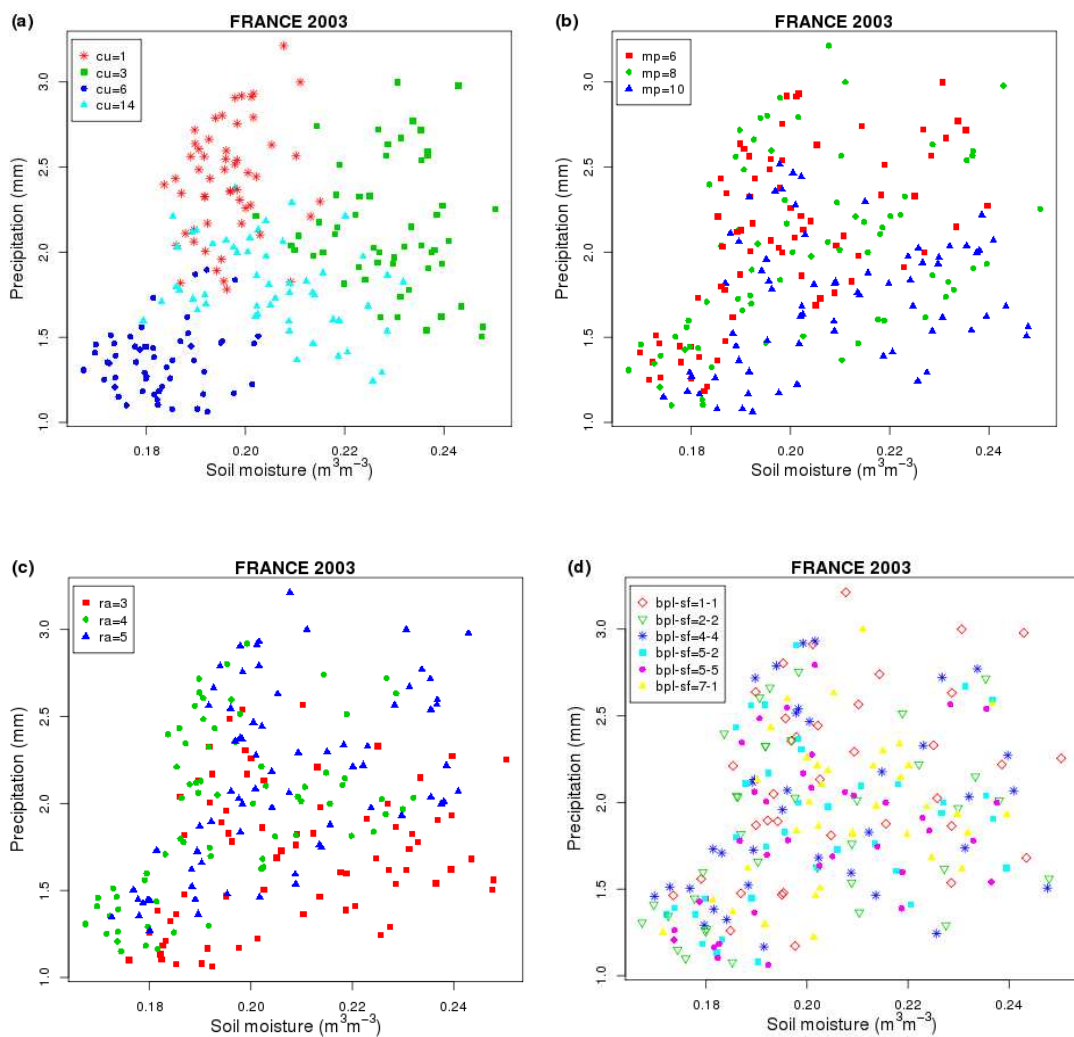

16

17

18

19 **Figure S3a-d:** Scatter plot with soil moisture content at the end of July and shortwave radiation during  
 20 the preceding months of June-July. Every point is one simulation. Different colors and symbols  
 21 represent different physics for convection (a), microphysics (b), radiation (c) and planet boundary  
 22 layer-surface (d).

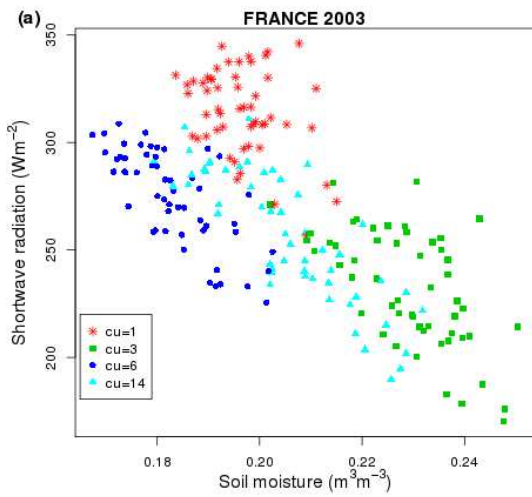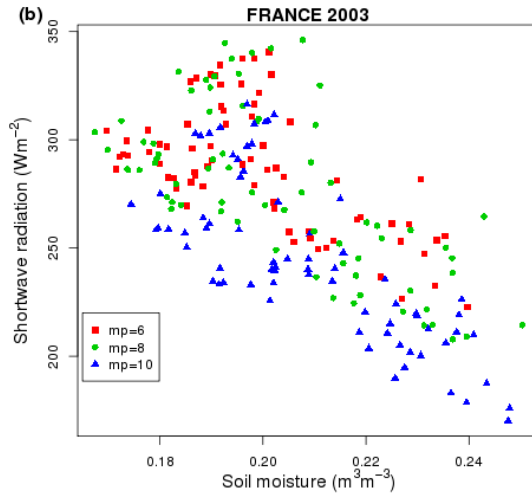

23

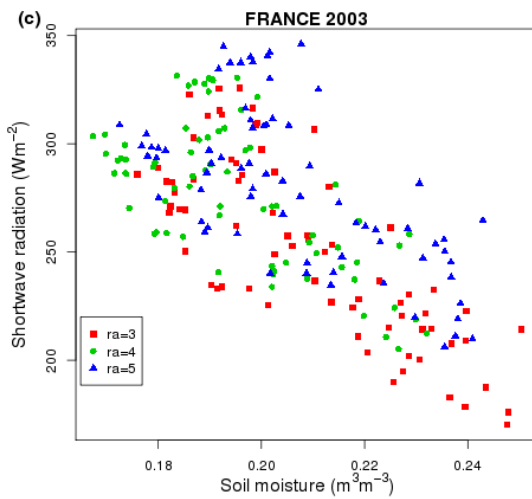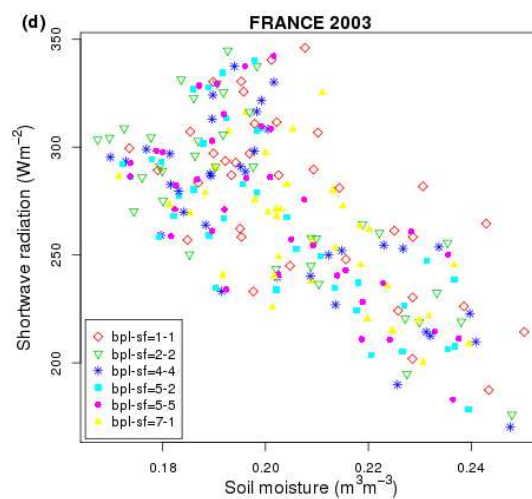

24

25 **Figure S4a-c:** Timeseries of temperature (a), precipitation (b) and latent heatflux (c) over Russia 2010.

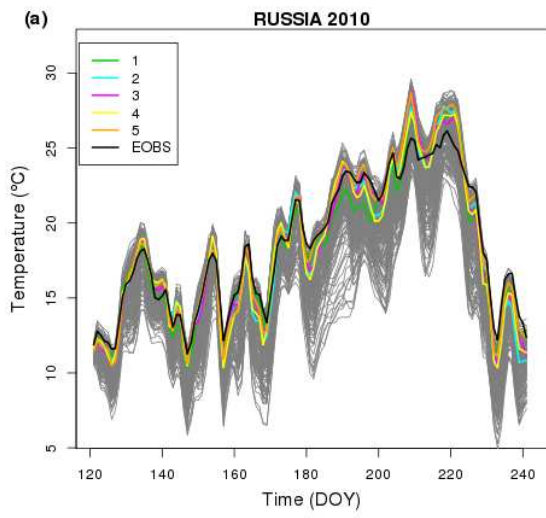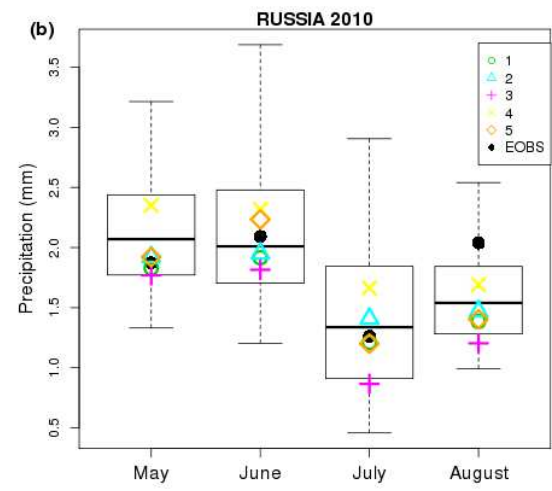

26

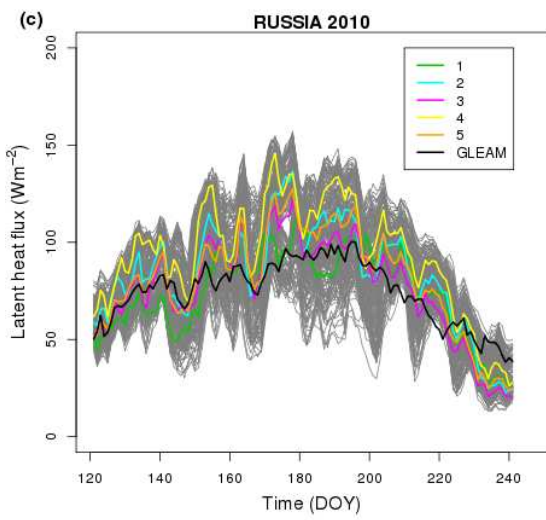

27

28

29 **Figure S5a-d:** Timeseries of temperature (a), precipitation (b), radiation (c) and latent heatflux (d) over  
30 France 2007.

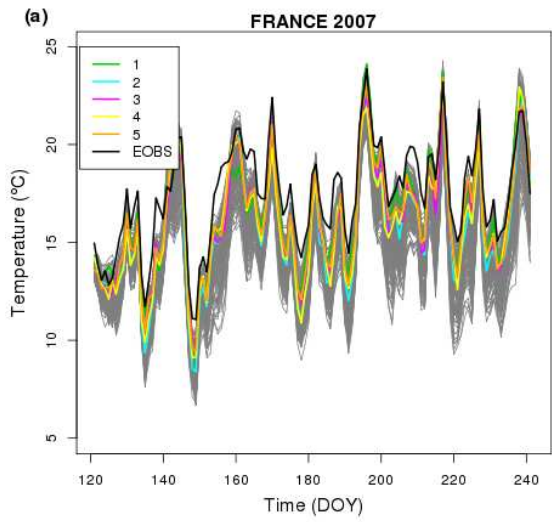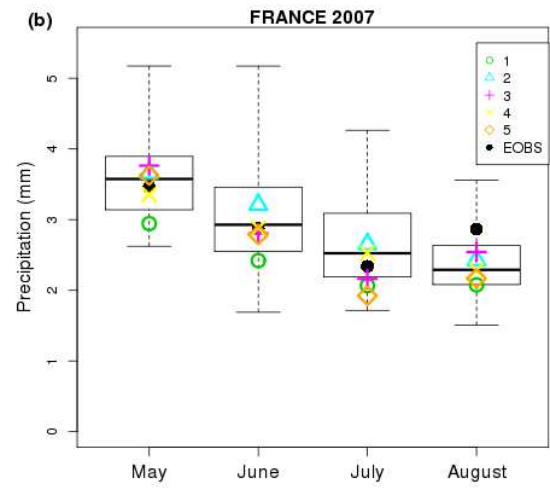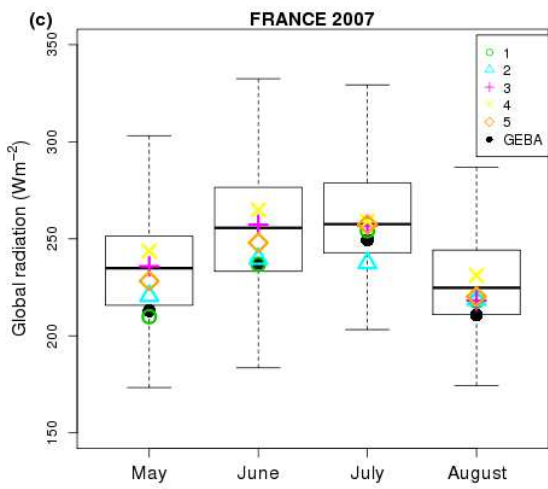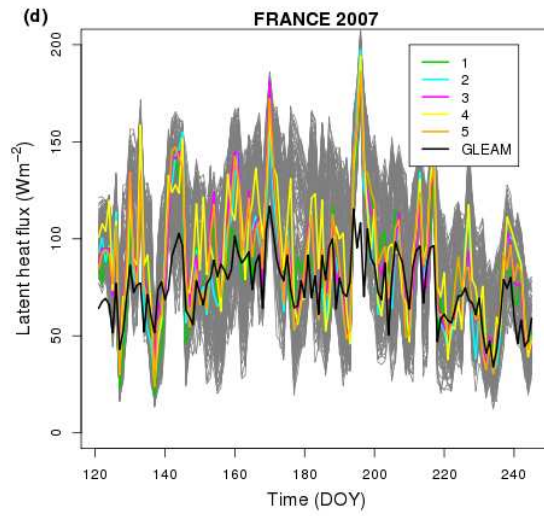

31

32

33

34

35 **Figure S6a-h:** Timeseries of temperature (a,d), precipitation (b,e) and latent heatflux (c,f,g,h) over the  
36 Iberian Peninsula 2003 (a,b,c), Scandinavia 2003 (d,e,f), the Iberian Peninsula 2010 (g) and  
37 Scandinavia 2010 (h).

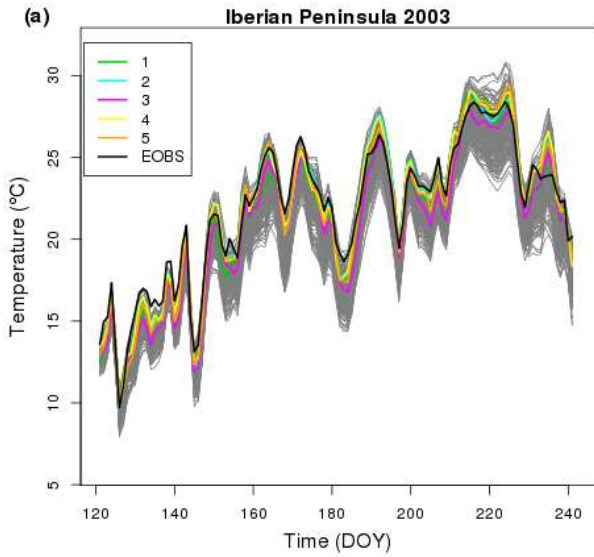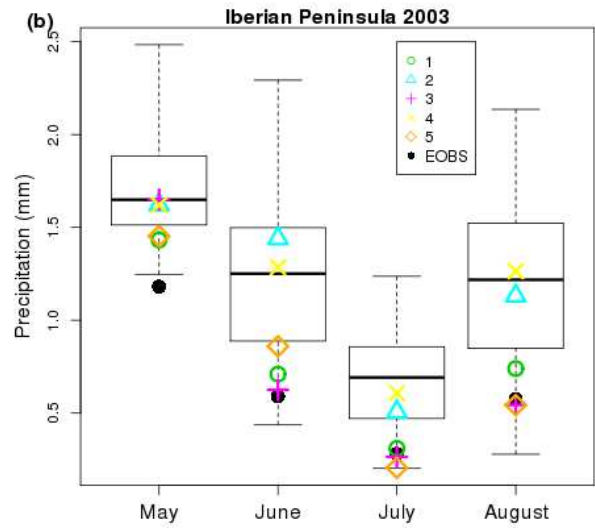

38

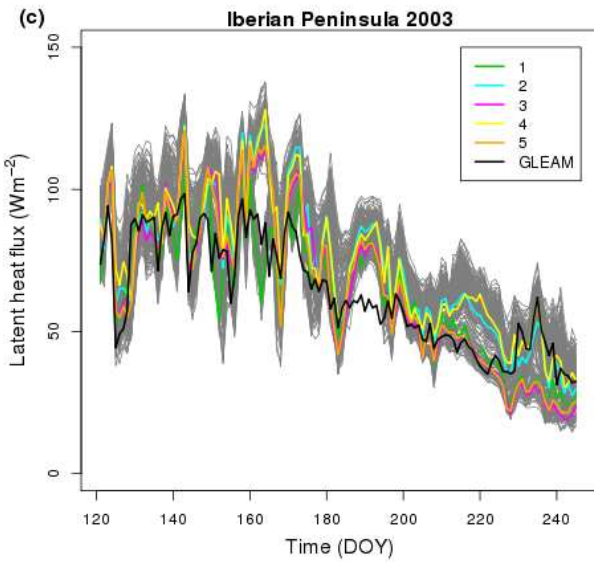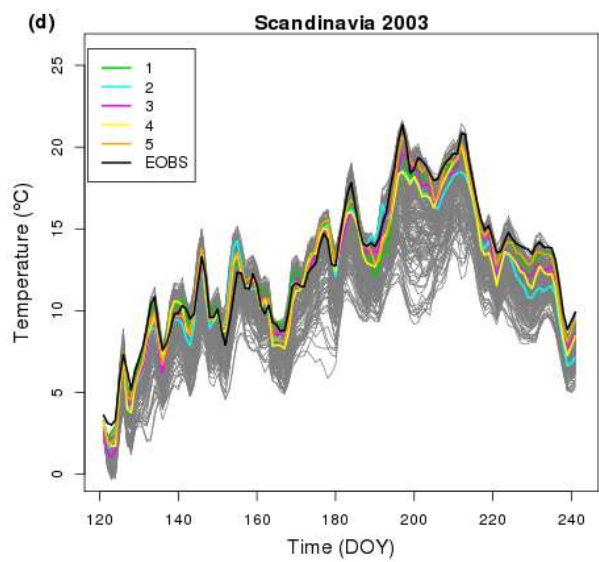

39



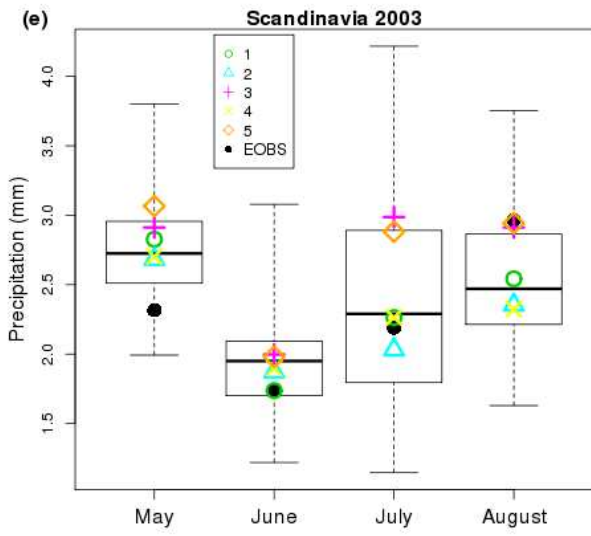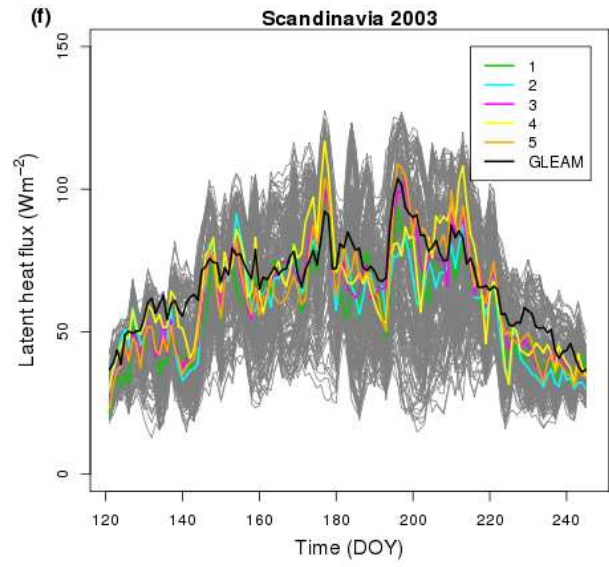

40

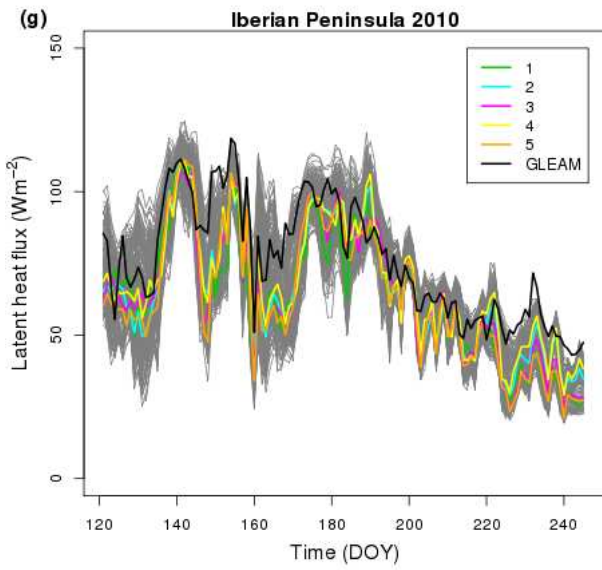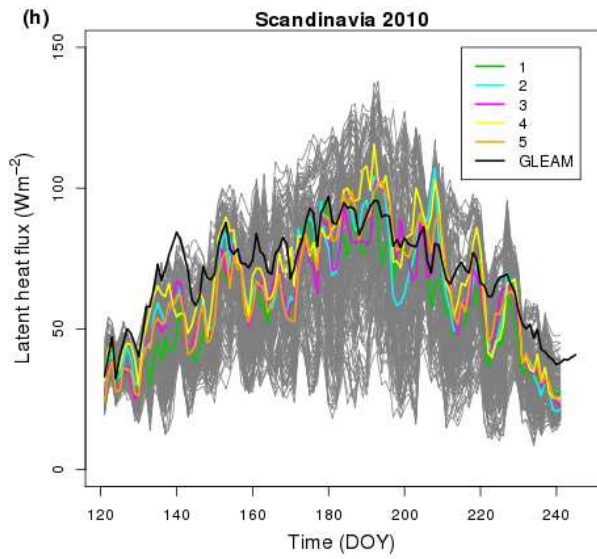

41

42
